# Supplementary material
Source: publisher figshare collection journal article supplement (https://acs.figshare.com/ndownloader/files/23819858)
Supplement: Supplementary file 1 [file 23819858]

## **Supporting Information *for***

### **Formation and *In vitro* evaluation of a deep eutectic solvent conversion film on biodegradable magnesium alloy**

Zhongxu Li<sup>a,b</sup>, Liting Guo<sup>a,b</sup>, Hui Yao<sup>c</sup>, Xiaosong Di<sup>c</sup>, Kai Xing<sup>a,b</sup>, Jiangping Tu<sup>a,b</sup>,

Changdong Gu<sup>\*,a,b</sup>

<sup>a</sup>*School of Materials Science and Engineering, State Key Laboratory of Silicon Materials, Zhejiang*

*University, Hangzhou 310027, China*

<sup>b</sup>*Key Laboratory of Advanced Materials and Applications for Batteries of Zhejiang Province, Hangzhou*

*310027, China*

<sup>c</sup>*Hebei Life Origin Bio-Technology Co, Shijiazhuang 051433, China*

<sup>\*</sup>Corresponding author. E-mail address: cdgu@zju.edu.cn; (C.D. Gu), Tel./fax: +86 571 87952573.

## 1. Experimental

### 1.1. Materials and chemicals

The LiCl–urea (LU) DES system was prepared by stirring a mixture of 18.55 g lithium chloride (LiCl, AR,  $\geq 98.0\%$ ) and 131.45 g urea ( $[\text{CO}(\text{NH}_2)_2]$ , AR,  $\geq 99.0\%$ ) in a beaker. Then the mixture was heated to 80 °C for about 60 minutes until a clear, colorless liquid was acquired. The substrates were pure Mg ( $\sim 99.8\%$  Mg) and AZ31B Mg alloy ( $\sim 95.7\%$  Mg,  $\sim 2.9\%$  Al,  $\sim 0.8\%$  Zn,  $\sim 0.6\%$  Mn) sheets with a size of 30 mm $\times$ 17 mm $\times$ 1 mm.

### 1.2. Preparation of conversion coatings

The conversion coating was prepared by a heat-treatment process in LU-DES. Firstly, substrates were polished by using SiC papers, and then samples were placed in autoclaves (100 mL) with DES (45 ml) at 200 °C for 30 min. The surfaces of samples were rinsed and dried entirely. Finally, the DES-treated Mg and AZ31B samples were named as LU-Mg and LU-AZ, respectively.

### 1.3. Surface characterization

A field emission scanning electron microscope (FE-SEM, Hitachi SU-70) was adopted to characterize the surface morphology and chemical composition of the conversion films. Crystalline structure of conversion films was analyzed by high-resolution transmission electron microscope (HRTEM, Tecnai-F200) with energy dispersive X-ray spectrometer (EDS) attachment and X-ray diffraction (XRD, XPert Pro-MPD with  $\text{CuK}\alpha$  radiation). The cross section of samples for TEM observations was prepared by focused ion beam (FIB, QUANTA 3D FEG). A protection layer of Pt with 1–2  $\mu\text{m}$  was deposited on the target area before preparation. Surface chemical valence state was characterized by X-ray photoelectron

spectroscopy (XPS, AXIS UTLTRADLD) with monochromatic  $\text{AlK}_{\alpha}$  radiation. XPS spectra were referred to the C1s peak at 284.6 eV. The thermogravimetric differential scanning calorimeter-Mass spectrometry (TG-DSC-MS) experiment was performed on Netzsch 209 F1 in nitrogen. The sample weights about 4 mg, and is heated to 350 °C at a heating rate of 1 °C/min. Mass spectrometers were used to analyze the gas products produced by the reaction, and then analyze the reaction mechanism.

#### *1.4. Corrosion resistance tests*

##### 1.4.1 Potentiodynamic polarization measurement

The corrosion resistance of the conversion films was evaluated by potentiodynamic polarization measurement in a Hank's solution at  $37\pm0.5^{\circ}\text{C}$ . The electrochemical measurement was conducted by a three-electrode cell (Chenhua Instruments Inc., China) with Pt as counter electrode and Ag/AgCl (saturated KCl) as reference electrode at a scan rate of  $1\text{ mV s}^{-1}$ . At least 15 min is needed for each sample (area of  $\sim 1\text{ cm}^2$ ) to be exposed in the solution for to stabilize the OCP before test. From the polarization curves, corrosion potential ( $E_{\text{corr}}$ ) and corrosion current density ( $i_{\text{corr}}$ ) were derived.

##### 1.4.2 pH measurement

Firstly, the sample weight was measured and recorded with an electronic microbalance. Then the sample (area of  $6\text{ cm}^2$ ) was placed into 50 mL centrifuge tubes with 4.8 mL Hank's solution at  $37\pm0.5^{\circ}\text{C}$ . The solution is changed once a day. The pH value of the solution in each tube was tested and recorded every other day for 25 days. After 25 days, samples were cleaned with chromic acid solution (200 g/L),<sup>1</sup> distilled water, and alcohol for 10 minutes to compute the mass loss, which was calculated according to the following relation:

$$\text{Mass loss} = \frac{(m_0 - m_1)}{S} \quad (\text{S1}),$$

where  $m_0$  and  $m_1$  mean the masses of samples before and after treatment.  $S$  is the surface area of samples.<sup>2</sup>

### *1.5 In vitro biocompatibility evaluation*

#### *1.5.1 Hemolysis tests*

Hemolysis tests of the Mg and AZ31B alloy substrates with and without conversion films were carried out according to ISO 10993-4: 2002.<sup>3</sup> The hemolysis procedures were approved by the Ethics Committee of Zhejiang University beforehand and were performed in strict accordance with institutional guidelines.<sup>4</sup> Samples were placed into sterile centrifuge tubes with PBS solution at  $37 \pm 0.5$  °C incubator for 30 min. Samples were placed into distilled water as the positive control. In contrast, samples were placed into PBS solution as negative control. The sample surface area/extraction medium volume equals 1.25:1 cm<sup>2</sup> mL<sup>-1</sup>. 10 mL venous blood from healthy volunteers was collected with heparin-containing blood collection tubes. Anticoagulant and PBS solution were mixed after autoclaving at a volume ratio of 4:5. Then centrifuge tubes were filled by 4.8 mL diluted blood and continually cultured at 37 °C for 60 min and 24 h. After this, the samples were centrifuged at 3000 r/min for 5 min. Then a 96-well plate was pipetted by 150 µL of the supernatant. A microplate photometer (Multiskan MK3, Thermo Scientific, USA) was adopted to measure absorbance values at a wavelength of 545 nm. The hemolysis percentage was calculated according to the following formula:<sup>4</sup>

$$\text{Hemolysis percentages} = \frac{A_S - A_N}{A_P - A_N} \quad (\text{S2}),$$

where  $A_S$  is the absorbency of the samples;  $A_P$  and  $A_N$  are the absorbency of the positive

control and the negative control, respectively.

### 1.5.2 *In vitro* cytotoxicity evaluation

*In vitro* evaluation was performed by an indirect method according to description of the paper.<sup>5</sup> The main investigation is the effect of extract on cell growth. Cell viability assay was carried out using the CCK-8 kit and MC3T3-E1 pre-osteoblast cells (mouse cell lines, MC3T3-E1). Firstly, the MC3T3-E1 was disposed with 0.25% EDTA trypsin and centrifuged. Then the cell was inoculated in a 96-well plate at a cell density of  $5 \times 10^3$  cells/mL, and cultured for 24 h. According to ISO 10993-5: 2009,<sup>6</sup> the preparation of extract is immersing the substrates with and without conversion films in the 50 mL centrifuge tubes for 72 h at a ratio of  $1.25 \text{ cm}^2 \text{ mL}^{-1}$ . The diluted extracts were added into the original medium of cells, and then incubated for 1, 3, and 5 d. After incubation for the corresponding time, 10  $\mu\text{L}$  CCK-8 solution was added to each well, wobbled carefully and sequentially incubated for 2 h in a 37 °C incubator. In the experiment, a microplate reader (Thermo, Multiskan go) was used to detect optical density of samples. Relative cell growth rate of the MC3T3-E1 of samples was calculated according to the following formula:<sup>4</sup>

$$\text{Relative cell growth rate(\%)} = \frac{A_t}{A_c} \times 100\% \quad (\text{S3}),$$

where the absorbance of samples and control groups is represented by  $A_t$  and  $A_c$ , respectively.

### 1.5.3 Antibacterial assays

Antibacterial properties of samples were evaluated using *Staphylococcus aureus* (*S. aureus*) as model bacteria. Firstly, *S. aureus* activated colonies was acquired by using the burned bacteria inoculation ring, and then inoculated into medium. Afterwards, the bacterial

solution was diluted to a concentration of  $5.0 \times 10^5$  cfu/mL with PBS solution.<sup>4</sup> The sterilized samples were immersed in bacterial suspension and cultured for 6 h, 24 h, and 72 h, respectively. After reaching the prescribed incubation time, each group of bacterial suspension was diluted with physiological saline to  $5.0 \times 10^2$  cfu/mL, and 50  $\mu$ L diluted bacterial suspension was coated on a blood plate overnight. The number of colonies on each blood plate was counted after taking pictures to evaluate the sterilizing ability of the material.

#### 1.5.4 Cytoskeleton staining experiment

MC3T3-E1 cells in logarithmic growth phase were inoculated into a 24-well plate at a cell density of  $1 \times 10^4$  cells/mL, and cultured in a cell incubator at 37 °C for 24 h at 5% CO<sub>2</sub>. The extract solution of the sample was obtained by the same procedure with the cytotoxicity evaluation. Then extracts and 500  $\mu$ L of 10% fetal bovine serum were added into each well. An equal amount of 10% fetal bovine and Alpha-MEM medium were added into the control group. After cultured in the incubator for 12 hours, the plate was washed with PBS solution. Then 500  $\mu$ L of 4% paraformaldehyde, Triton X-100 and rhodamine-labeled phalloidin stain, 4,6-diamidino-2-phenylindole (DAPI) and 300  $\mu$ L anti-fluorescence attenuation mount were added into each well one after another. Finally, cytoskeleton staining was observed and taken pictures under an inverted fluorescence microscope.

#### 1.5.5 Statistical analysis

In this study, statistical graphs were made with GraphPad Prism6 and data were represented with means  $\pm$  standard deviations. In addition, statistical significance was tested with the Student t test.  $P < 0.05$  was considered to meet the standard.

## References

- (1) Li, B.; Zhang, K. G.; Yang, W. Z.; Yin, X. S.; Liu, Y. Enhanced Corrosion Resistance of HA/CaTiO<sub>3</sub>/TiO<sub>2</sub>/PLA Coated AZ31 Alloy. *J. Taiwan Inst. Chem. Eng.* **2016**, *59*, 465-473.
- (2) Liu, W.; Yan, Z. J.; Zhang, Z. D.; Zhang, Y. X.; Cai, G. Y.; Li, Z. Y. Bioactive and Anti-corrosive Bio-MOF-1 Coating on Magnesium Alloy for Bone Repair Application. *J. Alloys and Compounds* **2019**, *788*, 705-711.
- (3) ISO10993-4: 2002/ Amd 1:2006. Biological Evaluation of Medical Devices-Part 4: Selection of Tests For Interactions with Blood. **2006**.
- (4) Lin, J. X.; Tong, X.; Shi, Z. M.; Zhang, D. C.; Zhang, L. S.; Wang, K.; Wei, A. P.; Jin, L. F.; Lin, J. G.; Li, Y. C.; Wen, C. A Biodegradable Zn-1Cu-0.1Ti Alloy with Antibacterial Properties for Orthopedic Applications. *Acta Biomater.* **2020**, *106*, 410-427.
- (5) Hanzi, A. C.; Gerber, I.; Schinhammer, M.; Löffler, J. F.; Uggowitzer, P. J. On the in Vitro and in Vivo Degradation Performance and Biological Response of New Biodegradable Mg-Y-Zn Alloys. *Acta Biomater.* **2010**, *6* (5), 1824-18338.
- (6) ISO 10993-5: 2009. Biological Evaluation of Medical Devices-Part 5: Tests for in Vitro Cytotoxicity. **2009**.
